# Supplementary material for: A Distinct and Divergent Lineage of Genomic Island-Associated Type IV Secretion Systems in Legionella
Source: PLoS One. 2013 Dec 16;8(12):e82221. doi: 10.1371/journal.pone.0082221 (PMC3864950; doi:10.1371/journal.pone.0082221)
Supplement: Table S1 — Annotation of LGI-T4SS genes. (XLS) [file pone.0082221.s004.xls]

## Sheet: Sheet1
Table S1. Annotation of LGI-T4SS genes.
												LGI-T4SS
												LGI-1						LGI-2			LdrGI-a	LlbGI	LdrGI-b	LdrGI-c	LdrGI-d
Gene	Homolog in ICEHin1056	Homolog in pKLC102	Conserved domains / Superfamily5	Putative Function	Homology in known T4SS4	Essential for conjugat-ion3	Needed for pilus formation3	Cellular localization PSORT	TM-HMMs	SignalP	Length	Philadelphia 1	Alcoy	Corby	Paris	130b	Lens	Paris	130b	Corby	L. drancourtii LLAP12	L. longbeachae D-4968	L. drancourtii LLAP12	L. drancourtii LLAP12	L. drancourtii LLAP12
lvrR			COG1974, SOS-response transcriptional repressors	Involved in SOS-reponse regulation				Cytoplasmic	0	No	84-227	CDS2	lpa_01534	LPC_2273	lpp1077	LPW_10961	lpl1039	lpp2375	LPW_21631	LPC_1857	LDG_0920		LDG_2375
lvrA								Unknown	0	No	288-303	lpg1005	lpa_01533	LPC_2274	lpp1076	LPW_10951	lpl1038	lpp2376	LPW_21641	LPC_1858	LDG_0919	LLB_1169	LDG_2376
lvrB								Unknown	0	No	116-130	lpg1004	lpa_01532	LPC_2275	lpp1075	LPW_10941	lpl1037	lpp2377	LPW_21651	LPC_1859	LDG_0918	LLB_1170	LDG_2377
lvrC			cl00670, Global regulator protein family	repressor of post-exponential growth genes, activates replicative phase				Unknown	0	No	61-72	lpg1003	lpa_01531	LPC_2276	lpp1074	LPW_10931	lpl1036	lpp2378	LPW_21661	LPC_1860	LDG_0917	LLB_1171	LDG_2378	LDG_29911	LDG_37501
lgiA	p1056.31		cl14024, conjugative transfer region protein, TIGR03748 family	outer membrane lipoprotein	PilL	Yes	Yes	Unknown	0	Yes	137-153	lpg1002	lpa_01530	LPC_2277	lpp1073	LPW_10921	lpl1035	lpp2379	LPW_21671	LPC_1861	LDG_0916	LLB_1172	LDG_2379	LDG_2989	LDG_3753
lgiB		CP64						Cytoplasmic	1	Yes	186-215	lpg1001	lpa_01528	LPC_2278	lpp1072	LPW_10911	lpl1034	lpp2380	LPW_21681	LPC_1862	LDG_0915	LLB_1173	LDG_2380	LDG_2988	LDG_3754
lgiC	p1056.32	CP65	cl14027, integrating conjugative element protein, PFL_4693		TraG			Unknown	0	Yes	273-281	lpg1000	lpa_01526	LPC_2279	lpp1071	LPW_10901	lpl1033	lpp2381	LPW_21691	LPC_1863	LDG_0914	LLB_1174	LDG_2381	LDG_2987	LDG_3755
lgiD	p1056.34	CP66	TIGR03765, integrating conjugative element protein, PFL_4695 family		TraW			Unknown	1	Yes	143-158	lpg0999	lpa_01525	LPC_2280	lpp1070	LPW_10891	lpl1032	lpp2382	LPW_21701	LPC_1864	LDG_0913	LLB_1175	LDG_2382	LDG_2986	LDG_3756
lgiE	p1056.37	CP68	cl14023, integrating conjugative element membrane protein, PFL_4697 family					Cytoplasmic Membrane	3	Yes	210-248	lpg0998	lpa_01523	LPC_2281	lpp1069	LPW_10881	lpl1031	lpp2383	LPW_21711	LPC_1865	LDG_0912	LLB_1176	LDG_2383	LDG_2985	LDG_3757
lgiF			TIGR01690, ICE_RAQPRD					Unknown	0	Yes	107-108	lpg0997	lpa_01522	LPC_2282	lpp1068	LPW_10871	lpl1030	lpp2384	LPW_21721	LPC_1866	LDG_0911	LLB_1177	LDG_2384	LDG_2984	LDG_3758
lgiG								Cytoplasmic Membrane	2	No	82-88	lpg0996	lpa_01521	LPC_2283	lpp1067	LPW_10861	lpl1029	lpp2385	LPW_21731	LPC_1867	LDG_0910	LLB_1178	LDG_2385	LDG_2983	LDG_3759
lgiH								Cytoplasmic Membrane	2	No	121-130	lpg0995	lpa_01519	LPC_2284	lpp1066	LPW_10851	lpl1028	lpp2386	LPW_21741	LPC_1868	LDG_0909	LLB_1179	LDG_2386	LDG_2982	LDG_3760
lgiI		CP76	cl13432, Protein of unknown function					Cytoplasmic Membrane	2	No	116-126	lpg0994	lpa_01518	LPC_2285	lpp1065	LPW_10841	lpl1027	lpp2387	LPW_21751	LPC_1869	LDG_0908	LLB_1180	LDG_2387	LDG_2981a2	LDG_3760a2
lgiJ	p1056.41	CP77	cl12968, Protein of unknown function			Yes	Yes	Cytoplasmic Membrane	1	Yes	215-220	lpg0993	lpa_01515	LPC_2286	lpp1064	LPW_10831	lpl1026	lpp2388	LPW_21761	LPC_1870	LDG_0907	LLB_1181	LDG_2388	LDG_2981	LDG_3761
lgiK	p1056.42	CP78	cl13372, Protein of unknown function					Unknown	0	Yes	257-261	lpg0992	pseudo	LPC_2287	lpp1063	LPW_10821	lpl1025	lpp2389	LPW_21771	LPC_1871	LDG_0906	LLB_1182	LDG_2389	LDG_2980	LDG_3762
lgiL	p1056.43	CP79	TIGR03752, integrating conjugative element protein; also Contains cl02576, bZIP transcription factor	Coiled-coil motif, forms part of mating pore	TraBFplasmid/VirB10	Yes	Yes	Unknown	1	No	419-465	lpg0991	lpa_01510	LPC_2288	lpp1062	LPW_10811	lpl1024	lpp2390	LPW_21781	LPC_1872	LDG_0905	LLB_1183	LDG_2390	LDG_2979	LDG_3763
lgiM	p1056.44	CP80	cl14025, conjugative transfer region lipoprotein, TIGR03751 family					Cytoplasmic Membrane	0	Yes	114-132	lpg0990	lpa_01509	LPC_2289	lpp1061	LPW_10801	lpl1023	lpp2391	LPW_21791	LPC_1873	LDG_0904	LLB_1184	LDG_2391	LDG_2978	LDG_3764
lgiN	p1056.45	CP81	cl14025, conjugative transfer region lipoprotein, TIGR03751 family	ATPase involved in providing energy for pilus assembly	TraCFplasmid	Yes	Yes	Cytoplasmic Membrane	0	No	916-933	lpg0989	lpa_01507	LPC_2290	lpp1060	LPW_10791	lpl1022	lpp2392	LPW_21801	LPC_1874	pseudo	LLB_1185	LDG_2392	LDG_2977	LDG_3765
lgiO	p1056.52	CP88	cl06067, TraU protein	Stablilizes the mating pair and formation of mating pore	TraUFplasmid	Yes	Yes	Unknown	0	No	324-337	lpg0988	lpa_01506	LPC_2291	lpp1059	LPW_10781	lpl1021	lpp2393	LPW_21811	LPC_1875	LDG_0900	LLB_1186	LDG_2393	LDG_2975	LDG_3767
lgiP	p1056.51	CP89	TIGR03755, integrating conjugative element protein		PilT	Yes	Yes	Unknown	0	Yes	455-468	lpg0987	lpa_01505	LPC_2292	lpp1058	LPW_10771	lpl1020	lpp2394	LPW_21821	LPC_1876	LDG_0899	LLB_1187	LDG_2394	LDG_2974	LDG_3768
lgiQ	p1056.48	CP91	TIGR03755, integrating conjugative element protein	VirB6 is involved in the mating pore	TraG/VirB6Fplasmid	Yes		Cytoplasmic Membrane	5	No	517-526	lpg0986	lpa_01504	LPC_2293	lpp1057	LPW_10761	lpl1019	lpp2395	LPW_21831	LPC_1877	LDG_0898	LLB_1188	LDG_2395	LDG_2973	LDG_3769
lgiR								Unknown	0	Yes	47-69	lpg0985	lpa_01503	LPC_2294	CDS2	LPW_10751	lpl1018	lpp2396	LPW_21841	LPC_1878	LDG_0897	LLB_1189	LDG_2396	LDG_2972	LDG_3770
lgiS								Cytoplasmic Membrane	3	Yes	81-110	lpg0984	lpa_01502	LPC_2295	lpp1056	LPW_10741	lpl1017	lpp2397	LPW_21851	LPC_1879	LDG_0896a2	LLB_1190	LDG_2396a2	LDG_2971	LDG_3771
lgiT	p1056.35	CP67	TIGR03754, conjugative coupling factor TraD	Coupling protein. Recruitment of DNA to the mating pore	TraD/VirD4Fplasmid	Yes	No	Cytoplasmic	0	No	644-825	lpg0983	lpa_01501	LPC_2296	lpp1055	LPW_10731	lpl1016	lpp2398	LPW_21861	LPC_1880	LDG_0896	LLB_1191	LDG_2397	LDG_2970	LDG_3772
lgiU								Cytoplasmic	0	No	160-243							lpp2399	LPW_21871	LPC_1881	LDG_0895			LDG_2969	LDG_3773
1. These genes in L. drancourtii do not share any seqeunce similarity to the other genes but may have the same function
2. These genes were not annotated in the original sequence but a putative CDS was detected manually
3. As experimentally shown using ICEHin1056 by Juhas et al (2007) Genome Biol 8: R237.
4. Homologs in Bold were found in this study via PSI-BLAST. Other relationships are based on homology to ICEHin1056 or ICESb1.
5. TIGR- matches to TIGRFAM database; cl - NCBI Protein Clusters; COG - Cluster of Orthologous groups
